# Supplementary material for: Cost-Effectiveness of GaitSmart and an Artificial Intelligence Solution for Rehabilitation of Patients with Hip and Knee Osteoarthritis in Older Population in the United Kingdom
Source: Preprints.org preprint supplement (doi:10.20944/preprints202405.1251.v1), 2024-05-20
Supplement: Supplementary file 2 [file supplementary]

**Table S1.** Probabilistic sensitivity results comparing GS versus SoC

| Interventions | Mean Cost - £ (95%CI) | Incremental Cost - £ (95%CI) | Mean (QALYs) (95%CI) | Incremental (QALYs) (95%CI) | ICER - £ (95%CI) |
| --- | --- | --- | --- | --- | --- |
| SoC | 518.72  (421.87 – 622.24) | - | 0.26  (0.16 – 0.38) | - | - |
| GS | 67.15  (50.53 - 92.25) | -451.57  (-354.48 – -558.42) | 0.28  (0.14 – 0.45) | 0.02  (-0.17 – 0.22) | Dominant |

CI: confidence interval, GS: GaitSmart, ICER: incremental cost-effectiveness ration, QALY: quality adjusted life years, SoC: standard of care
